# Supplementary material for: RNF12 X-Linked Intellectual Disability Mutations Disrupt E3 Ligase Activity and Neural Differentiation
Source: PubMed Central journal article supplement (PMC5976579; doi:10.1016/j.celrep.2018.04.022), 2018-05-08
Supplement: mmc1.pdf [file mmc1.pdf]

**Cell Reports, Volume 23**

**Supplemental Information**

**RNF12 X-Linked Intellectual Disability**

**Mutations Disrupt E3 Ligase Activity**

**and Neural Differentiation**

**Francisco Bustos, Anna Segarra-Fas, Viduth K. Chaugule, Lennart Brandenburg, Emma Branigan, Rachel Toth, Thomas Macartney, Axel Knebel, Ronald T. Hay, Helen Walden, and Greg M. Findlay**

## SUPPLEMENTARY DATA

**Supplementary Table 1: Primer sequences, related to Experimental procedures**

| <b>Gene</b> | <b>Forward (5' to 3')</b> | <b>Reverse (5' to 3')</b> |
|-------------|---------------------------|---------------------------|
| Nanog       | CTCATCAATGCCTGCAGTTTTTCA  | CTCCTCAGGGCCCTTGTCAGC     |
| Fgf5        | GCTGTGTCTCAGGGGATTGT      | CACTCTCGGCCTGTCTTTTC      |
| Klf4        | ACACTTGTGACTATGCAGGCTGTG  | TCCCAGTCACAGTGGTAAGGTTTC  |
| Dnmt3b      | CTGGCACCCCTCTTCTTCATT     | ATCCATAGTGCCTTGGGACC      |
| Sox1        | TTCCCCAGGACTCCGAGGCG      | GCTGTGTGCCTCCTCTGCGG      |
| Pax6        | GGACTTCAGTACCAGGGCAACC    | GCATCTGAGCTTCATCCGAGTC    |
| Ascl1       | TCTCCTGGGAATGGACTTTG      | GGTTGGCTGTCTGGTTTGT       |
| Brachyury   | TCCCGAGACCCAGTTCATAG      | TTCTTTGGCATCAAGGAAGG      |
| Sox17       | TATGGTGTGGGCCAAAGACGAA    | AACGCCTTCCAAGACTTGCCTA    |
| GAPDH       | CTCGTCCCGTAGACAAAA        | TGAATTTGCCGTGAGTGG        |

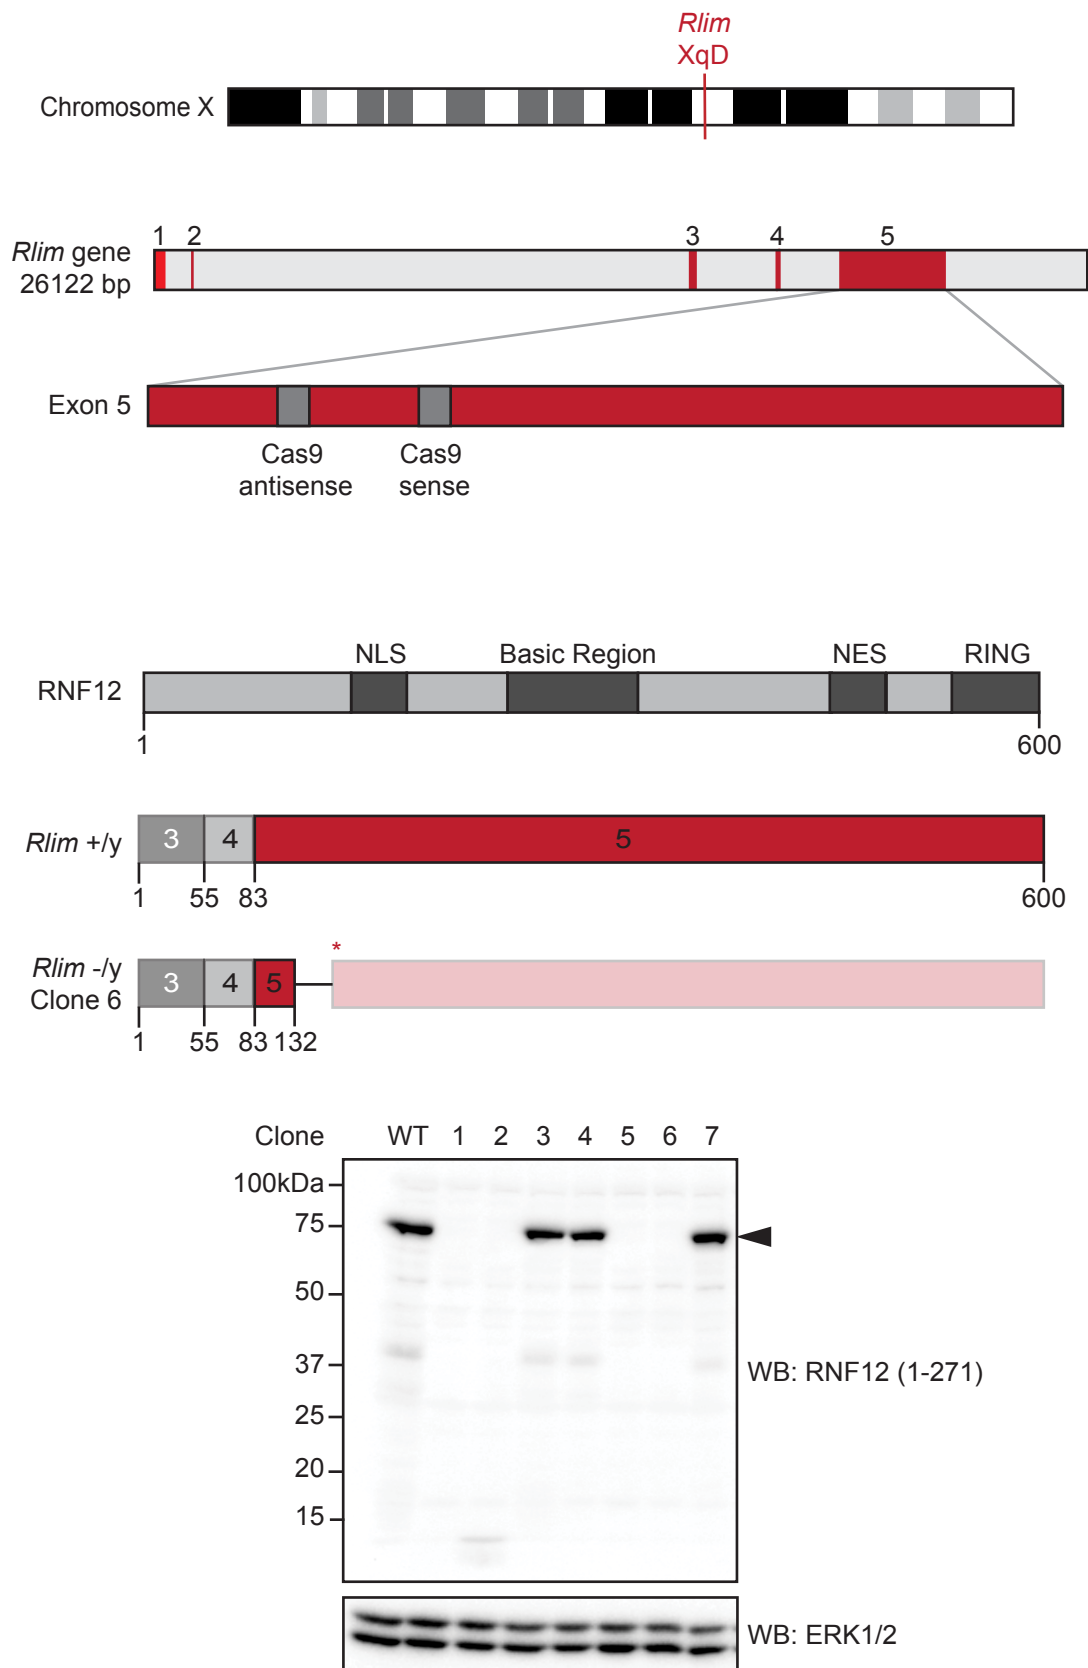

**Figure S1. RNF12/*Rlim* CRISPR/Cas9 gene knockout strategy (related to Figure 1).**

Paired CRISPR/Cas9 guide RNAs were designed to target exon 5 of the *Rlim* gene on Chromosome X. Genomic DNA sequencing analysis of the isolated clone 6 predicts a truncated mRNA/protein of 132 amino acids. RNF12 immunoblot analysis does not detect a protein product in resulting *Rlim* -/y ESC line.

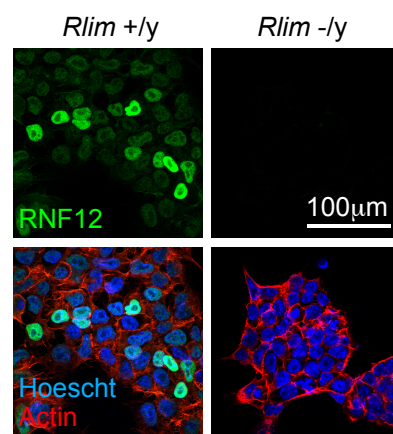

**Figure S2. Endogenous RNF12 protein is localised to the nucleus (related to Figure 2).** *Rlim* +/y and -/y ESCs were analysed via immunofluorescence and confocal microscopy.



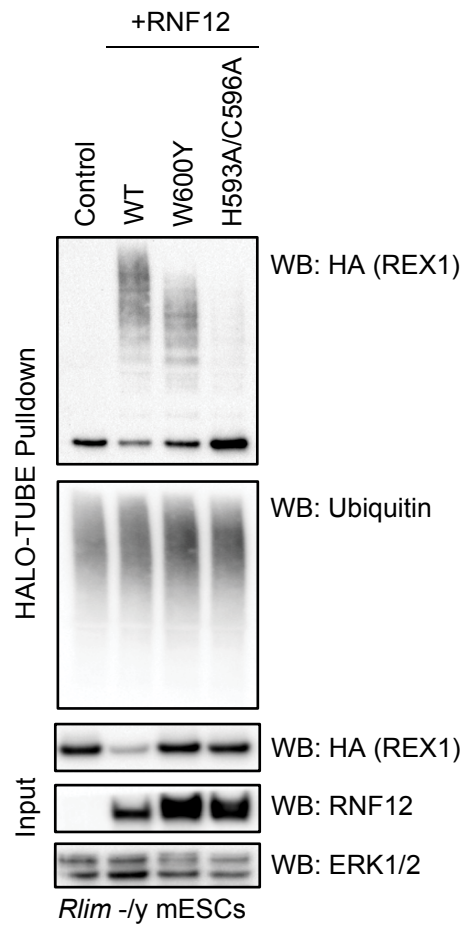

**Figure S3. RNF12 catalytic activity is required for REX1 ubiquitylation and degradation (related to Figure 3).**

*Rlim*<sup>-/-</sup> ESCs were transfected with HA-REX1 and wild-type RNF12 or the indicated catalytic mutants. Ubiquitylated proteins were captured using HALO-TUBE resin and HA-REX1 ubiquitylation determined by immunoblotting. Total ubiquitin levels are shown as a control. HA-REX1, RNF12 and ERK1/2 levels in cell lysates were determined by immunoblotting.

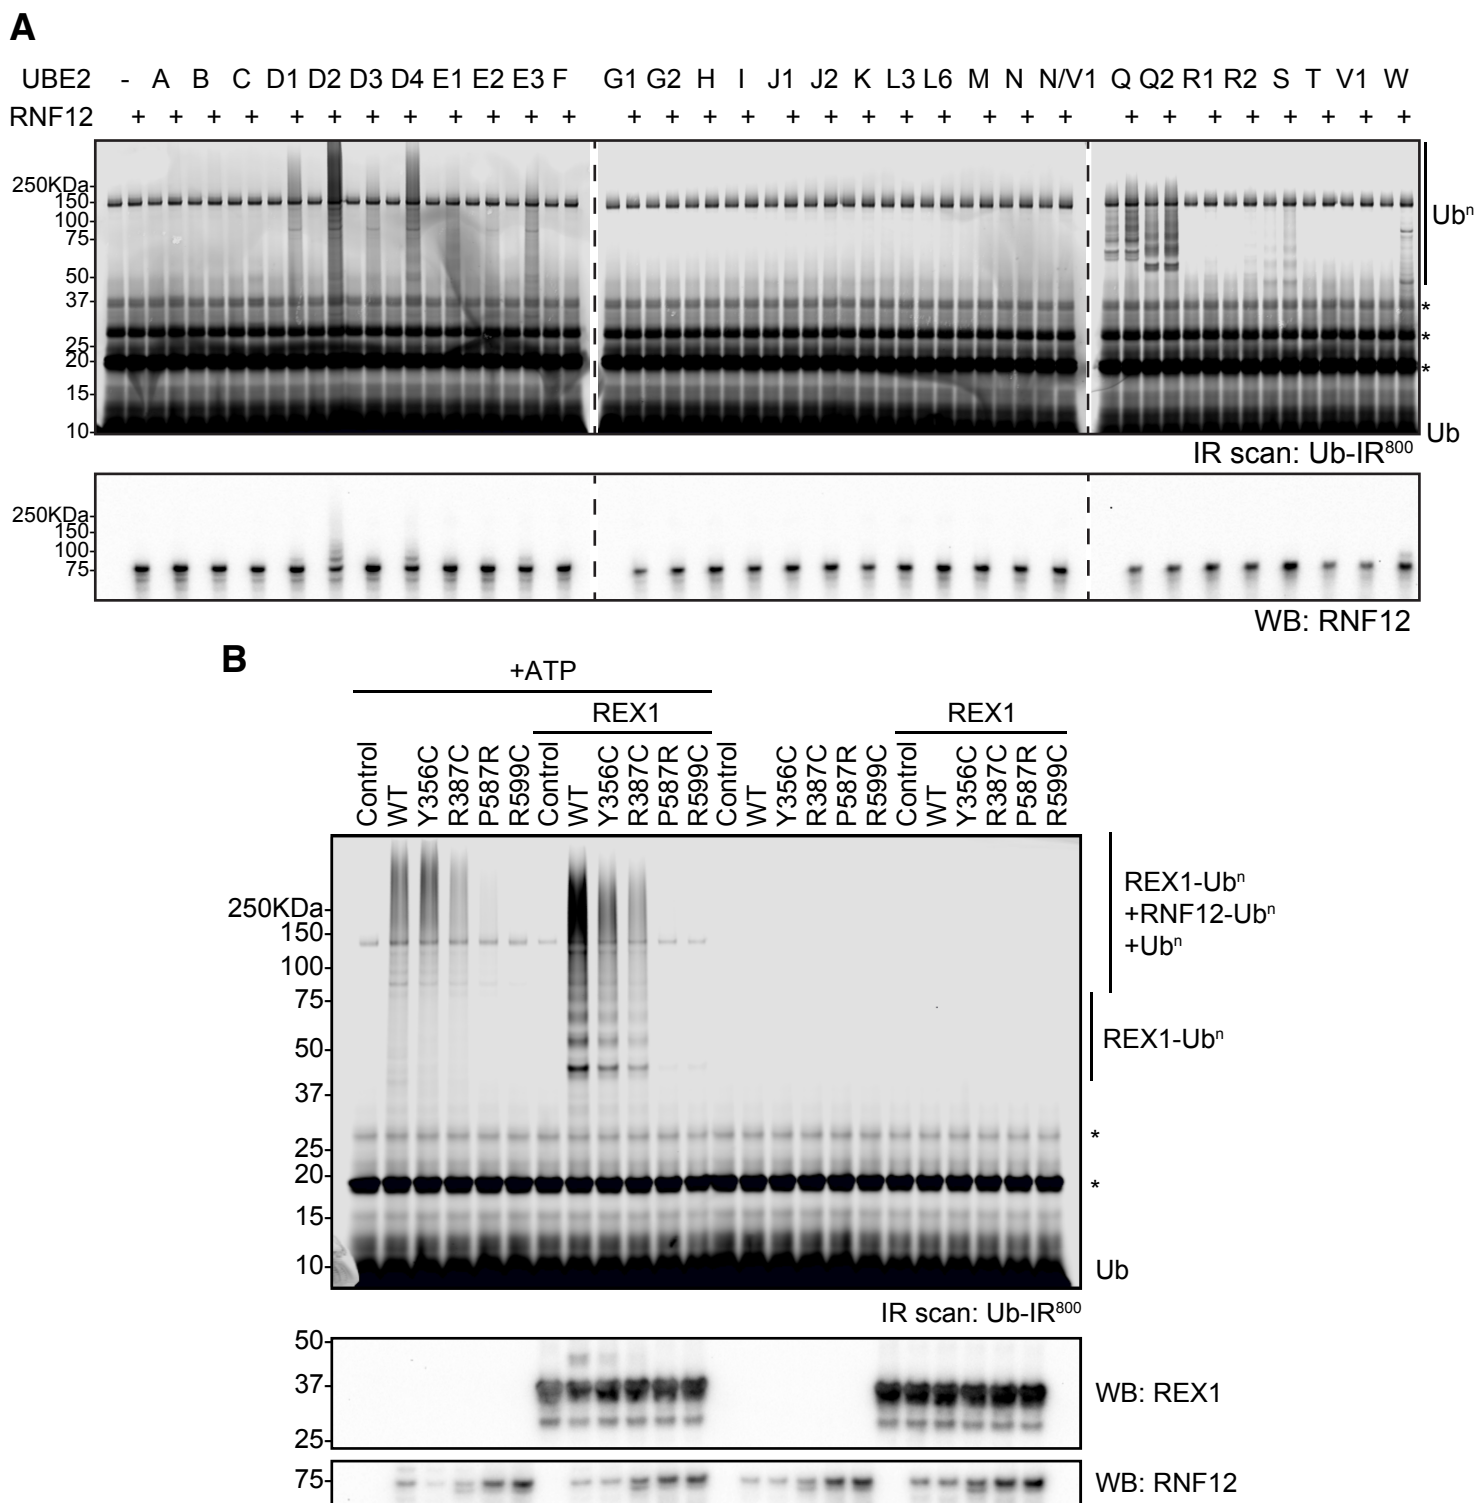

**Figure S4. In vitro characterisation of RNF12 catalytic activity (related to Figure 4).**

(A) Analysis of RNF12 ubiquitylation activity in combination with a panel of 31 E2 ubiquitin conjugating enzymes. Infra-red scan (Ub-IR<sup>800</sup>) shows labelled fluorescent ubiquitin chains (Ub<sup>n</sup>). RNF12 levels were determined by immunoblotting. \* = non-specific fluorescent band. (B) In vitro REX1 ubiquitylation by WT or XLID mutant RNF12 proteins. Infra-red scan (Ub-IR<sup>800</sup>) shows labelled fluorescently labelled ubiquitylated proteins. REX1 and RNF12 levels were determined by immunoblotting. Specific ubiquitylated REX1 (REX1-Ub<sup>n</sup>) and RNF12 (RNF12-Ub<sup>n</sup>) signals are indicated. \* = non-specific fluorescent band.

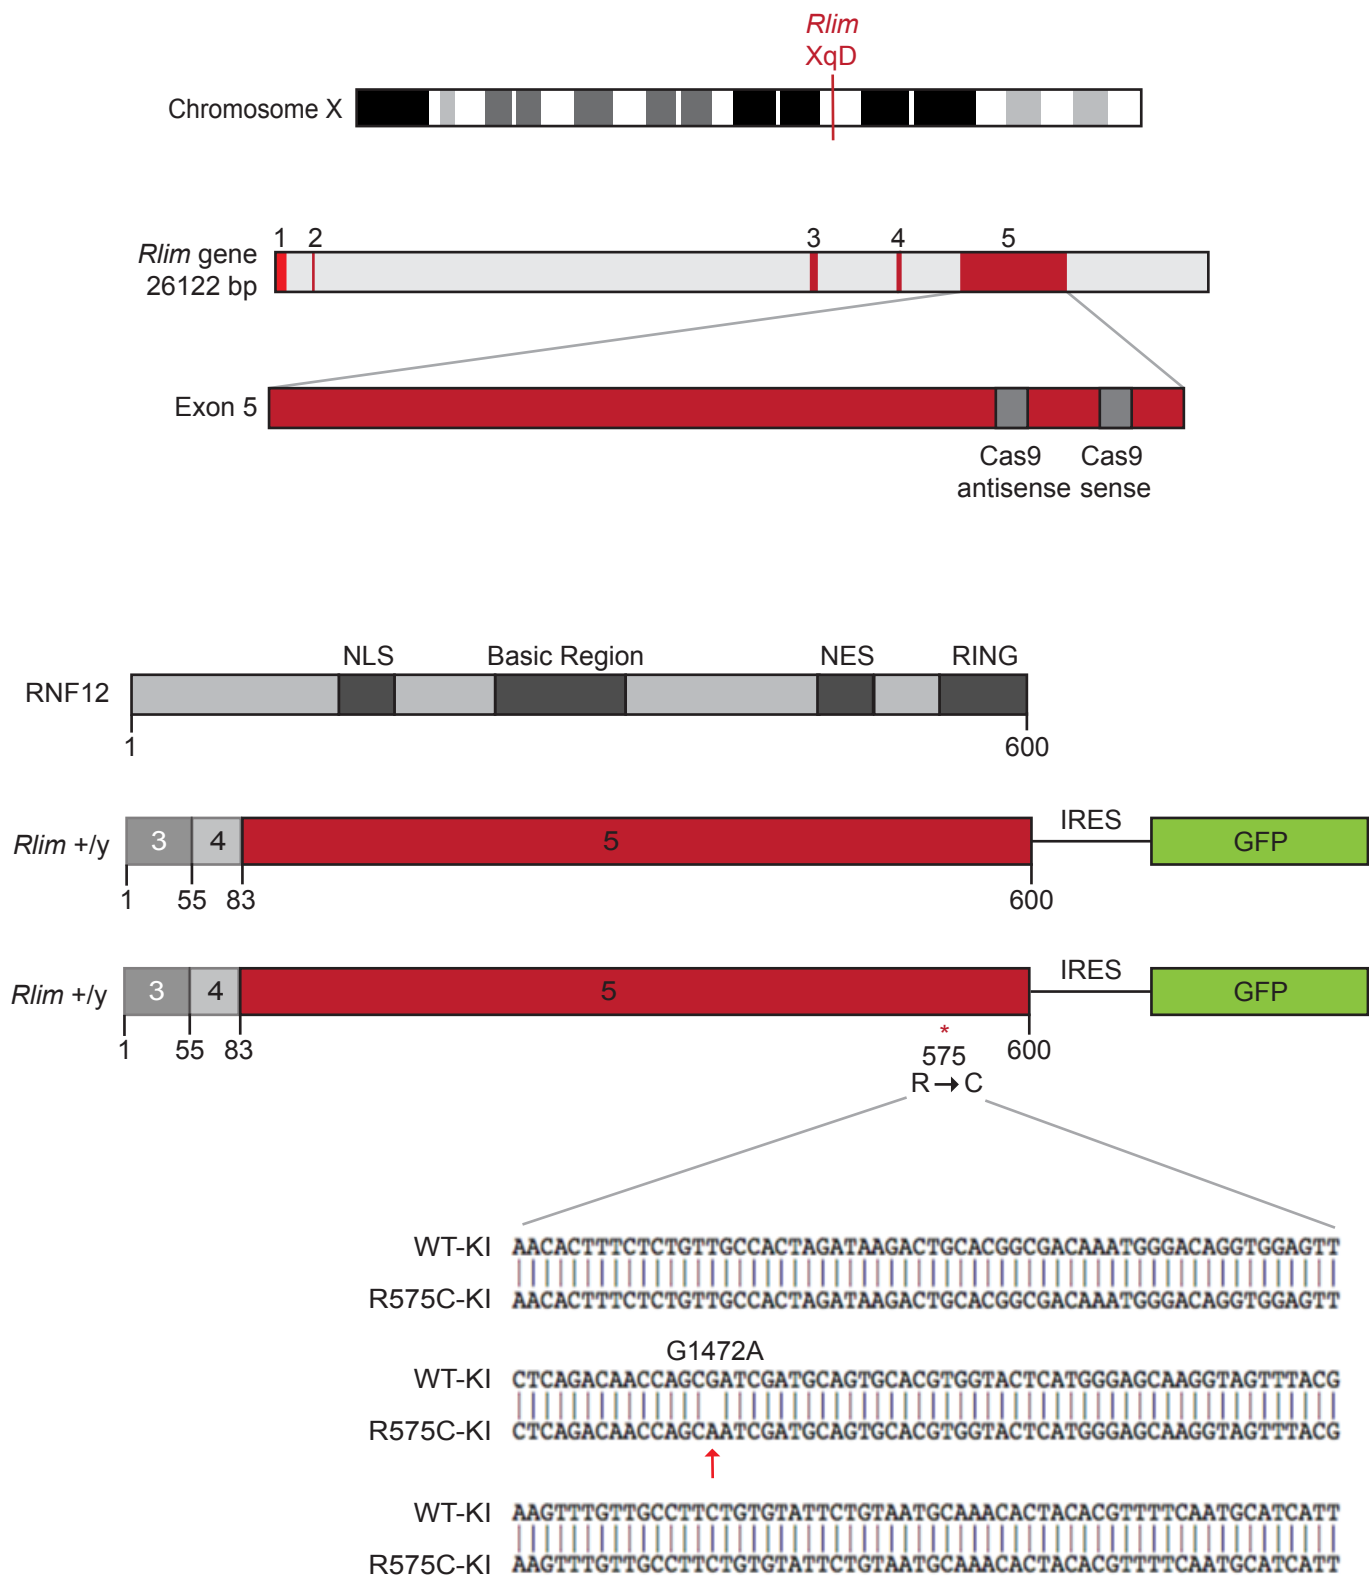

**Figure S5. RNF12/*Rlim* WT and R575C CRISPR/Cas9 knock-in strategy (related to Figure 5).**

Paired CRISPR/Cas9 guide RNAs were designed to target exon 5 of the *Rlim* gene on Chromosome X in order to replace endogenous RNF12 with either RNF12 WT or R575C fused to IRES-EGFP. Genomic DNA sequencing of *Rlim* WT-KI and R575C-KI ESCs confirmed the presence of wild-type RNF12 or introduction of a single nucleotide substitution resulting in R575C mutation, respectively.
